# Supplementary material
Source: MDPI journal article supplement (https://www.mdpi.com/2076-3417/13/3/1375)
Supplement: s1 [file s1]

## 1. SEM

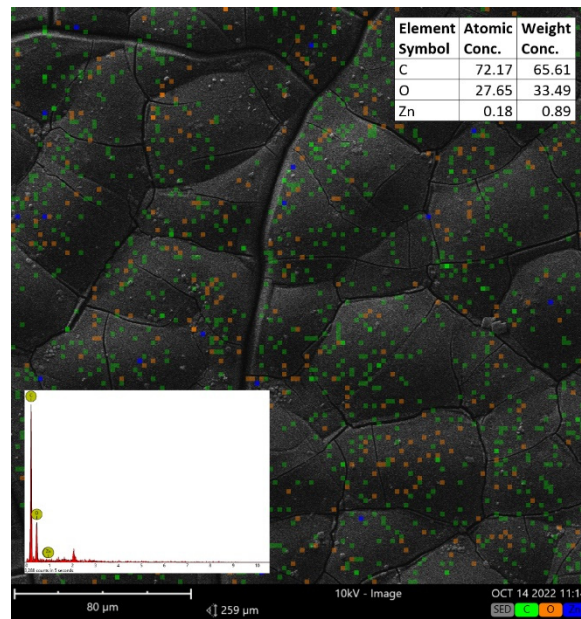

Figure S1. ZnO dispersion in C0.5 sample surfaces at INT2880

## 2. GRAVIMETRY

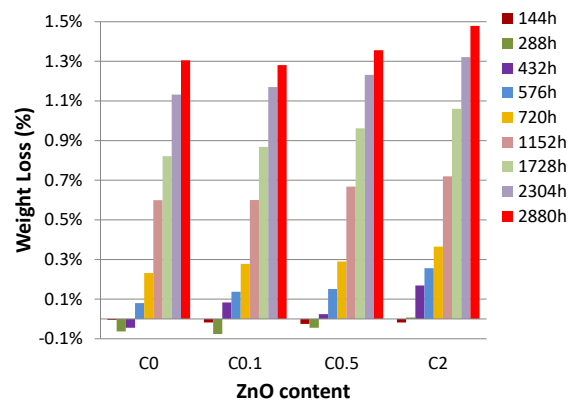

Figure S2. Weight loss (%) including initial 144-hour measurement intervals

### 3. DIELECTRIC SPECTROSCOPY

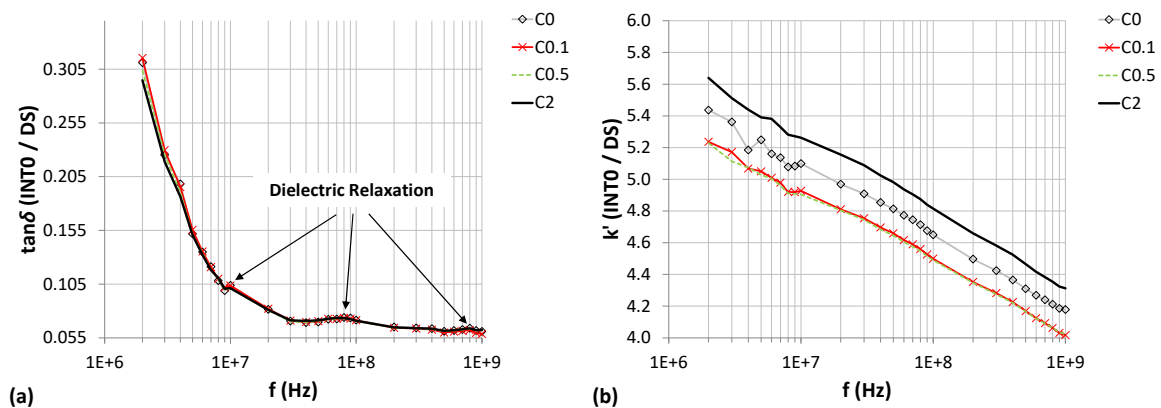

**Figure S3.1:** Graphic representation of reconditioned samples' dielectric behavior at INT0 in the full measurement range  $2 \times 10^6$  -  $1 \times 10^9$  Hz together with dielectric relaxation occurrence **(a)**  $\tan\delta$ , **(b)**  $k'$

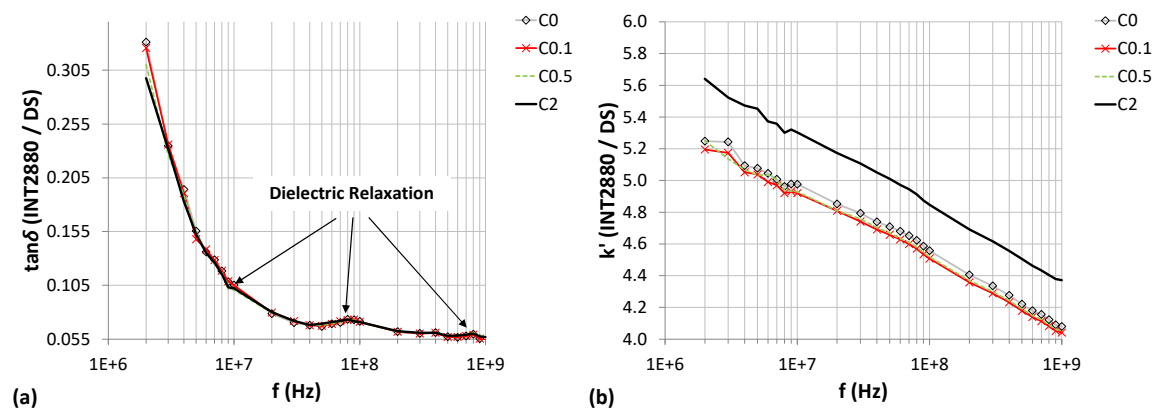

**Figure S3.2:** Graphic representation of reconditioned samples' dielectric behavior at INT2880 in the full measurement range  $2 \times 10^6$  -  $1 \times 10^9$  Hz together with dielectric relaxation occurrence **(a)**  $\tan\delta$ , **(b)**  $k'$

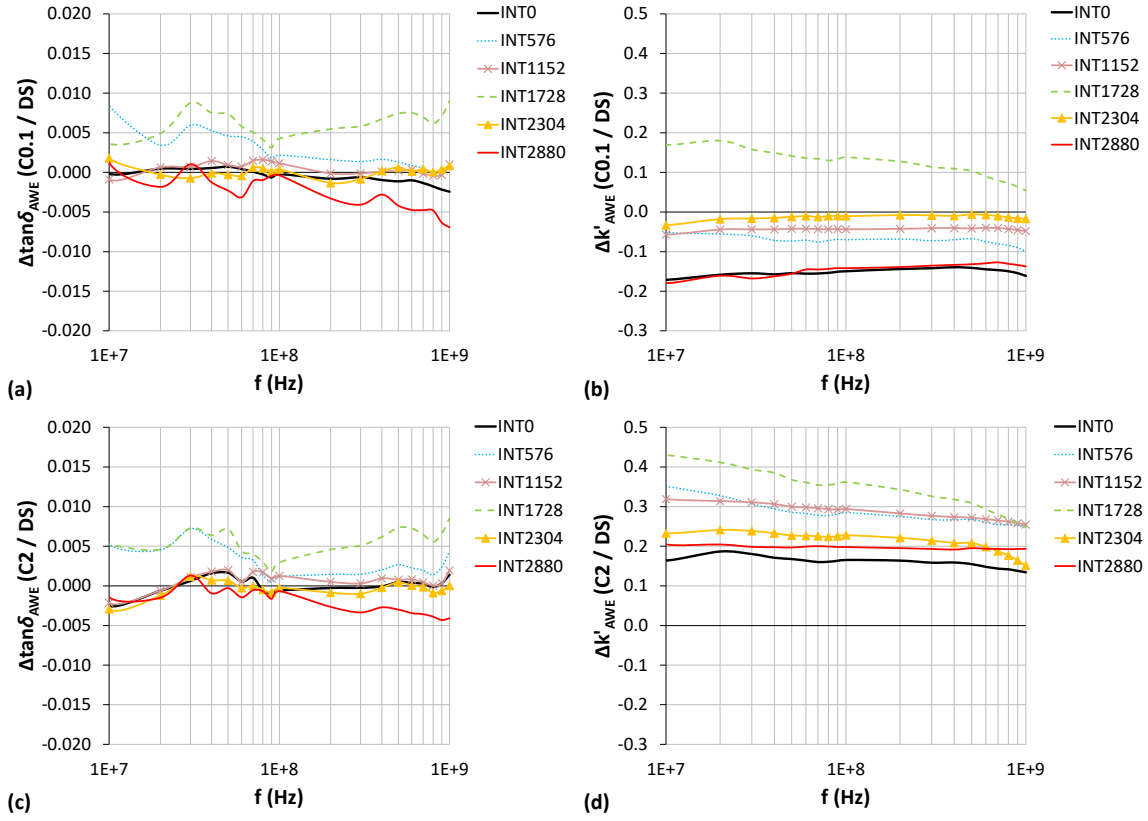

**Figure S3.3:** Dielectric properties of C0.1 & C2 samples during AWE treatment compared to C0 / INTO in DS (a)  $\Delta \tan \delta_{AWE} = \tan \delta_{C0.1/INTx} - \tan \delta_{C0/INT0}$  (b)  $\Delta k'_{AWE} = k'_{C0.1/INTx} - k'_{C0/INT0}$  (c)  $\Delta \tan \delta_{AWE} = \tan \delta_{C2/INTx} - \tan \delta_{C0/INT0}$  (d)  $\Delta k'_{AWE} = k'_{C2/INTx} - k'_{C0/INT0}$

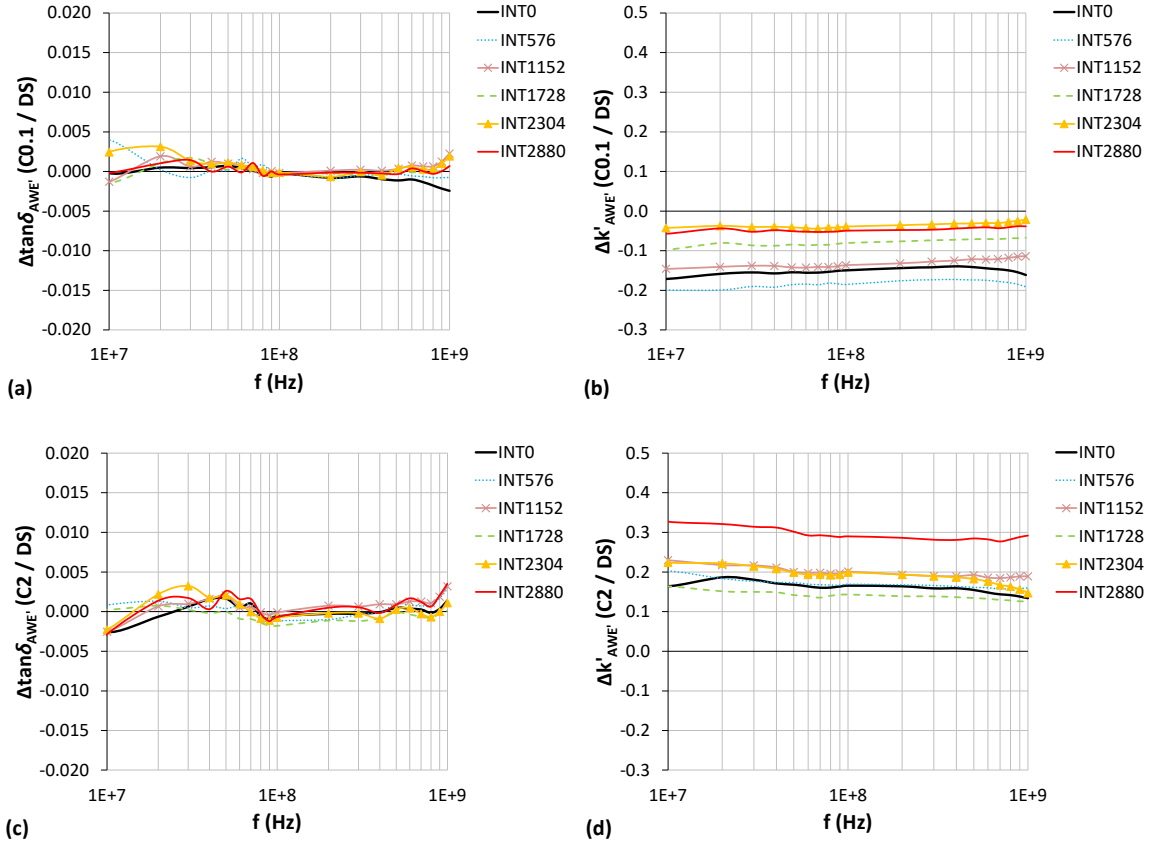

**Figure S3.4:** Dielectric properties of C0.1 & C2 samples during AWE treatment compared to C0 / INTx in DS (a)  $\Delta \tan \delta_{AWE'} = \tan \delta_{C0.1/INTx} - \tan \delta_{C0/INTx}$  (b)  $\Delta k'_{AWE'} = k'_{C0.1/INTx} - k'_{C0/INTx}$  (c)  $\Delta \tan \delta_{AWE'} = \tan \delta_{C2/INTx} - \tan \delta_{C0/INTx}$  (d)  $\Delta k'_{AWE'} = k'_{C2/INTx} - k'_{C0/INTx}$
